# Supplementary material for: 1,2,3-Triazolyl-pyridine derivatives as chelating ligands for blue iridium(iii) complexes. Photophysics and electroluminescent devices
Source: Royal Society of Chemistry journal article supplement (doi:10.1039/b805324c), 2008-01-01
Supplement: b805324c.pdf [file b805324c.pdf]

## Supporting Information

### 1,2,3-Triazolyl-Pyridine Derivatives as Chelating Ligands for Blue Iridium(III) Complexes. Photophysics and Electroluminescent Devices

Enrico Orselli, Rodrigo Q. Albuquerque, P. Michel Fransen, Roland Fröhlich, Henk M. Janssen, and Luisa De Cola.\*

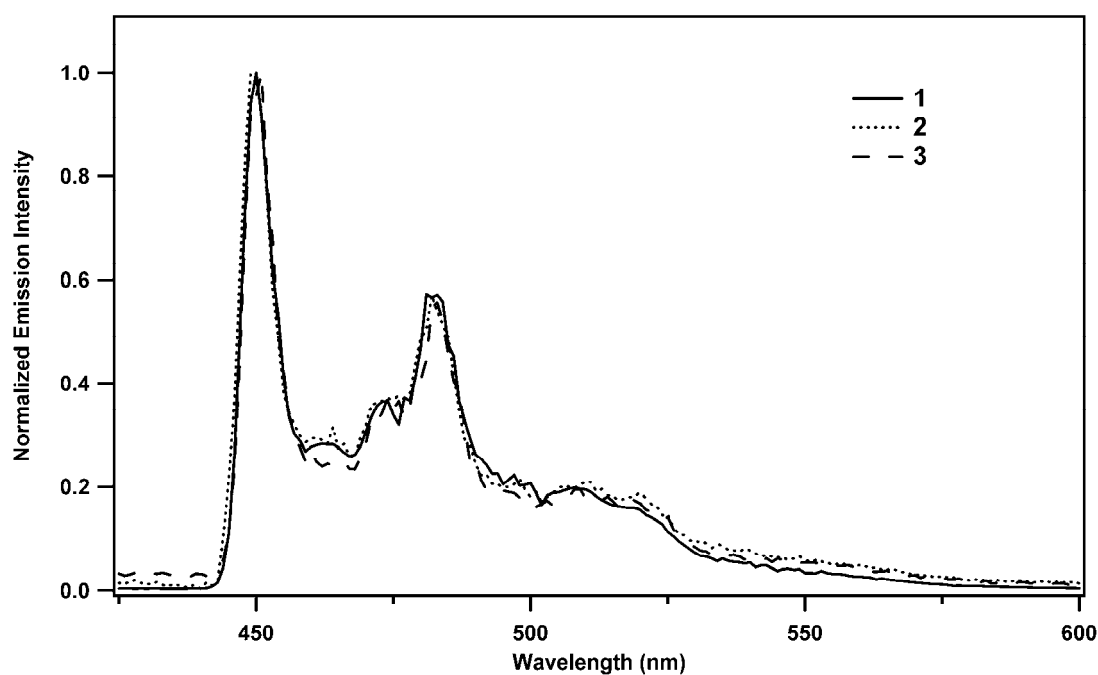

**Figure S1.** Emission spectra of **1**, **2** and **3** at 77 K in butyronitrile.

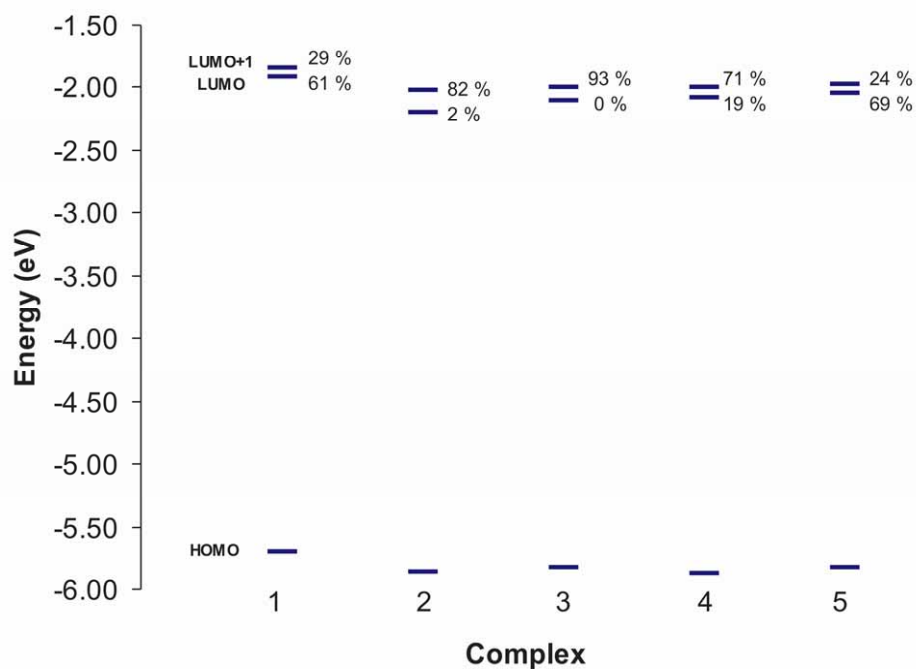

**Figure S2.** Schematic representation of the HOMO, LUMO and LUMO+1 molecular orbitals. The percentage indicates the total contribution of each MO to the triplet excited state. The other minor contributing molecular orbitals were omitted for clarity.

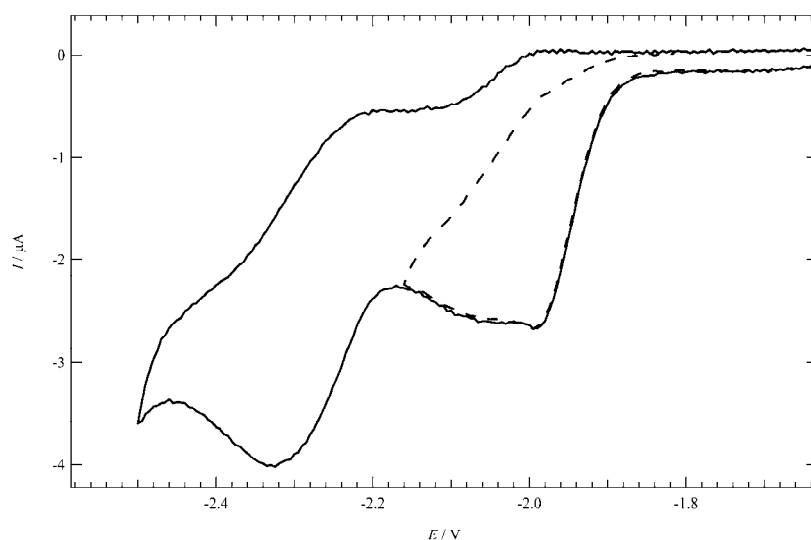

**Figure S3.** Negative scan (cyclic voltammetry) of complex **2** in acetonitrile. The first reduction wave becomes reversible only if scanned up to the second reduction.

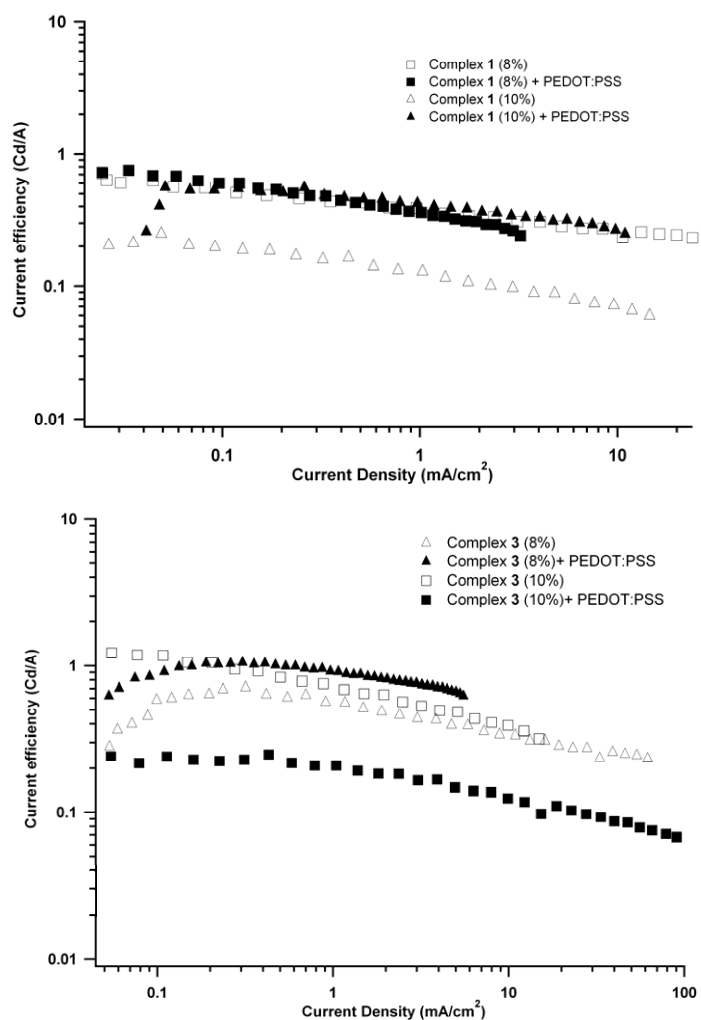

**Figure S4.** Current efficiencies of devices doped with complex 1 (top) and complex 3 (bottom).
